# Supplementary figures and images for: Multiple independent origins of a protease inhibitor resistance mutation in salvage therapy patients
Source: Springer Nature journal article supplement (doi:10.1186/1742-4690-5-7), 2008-01-25

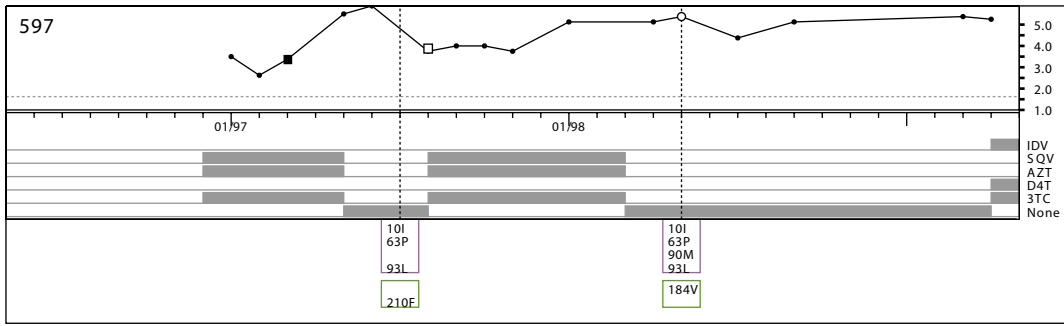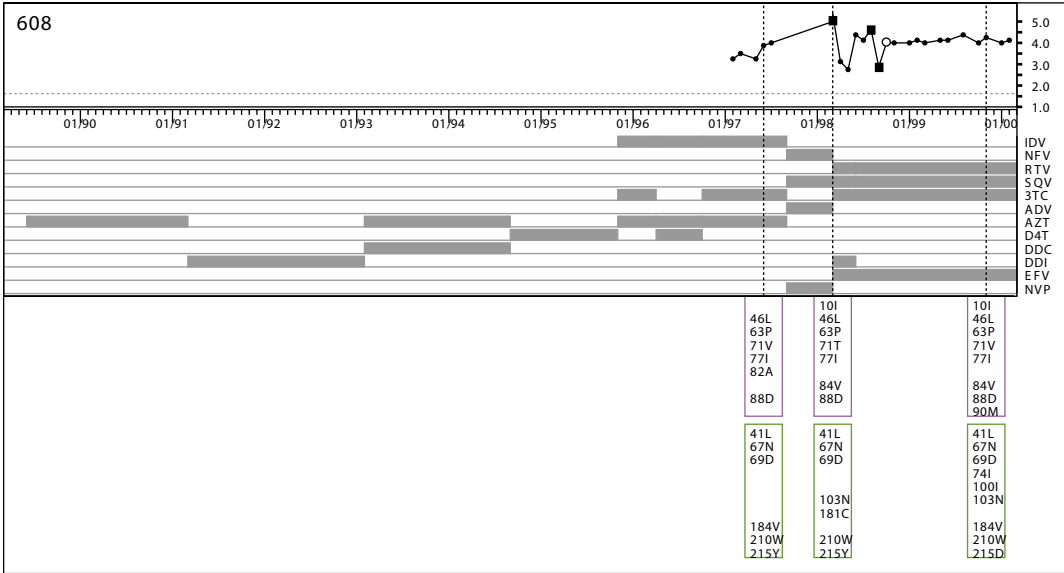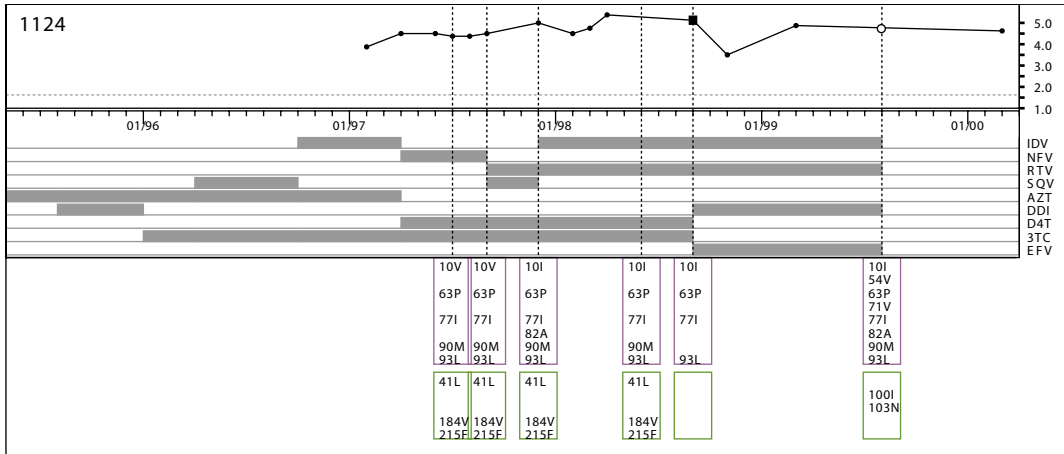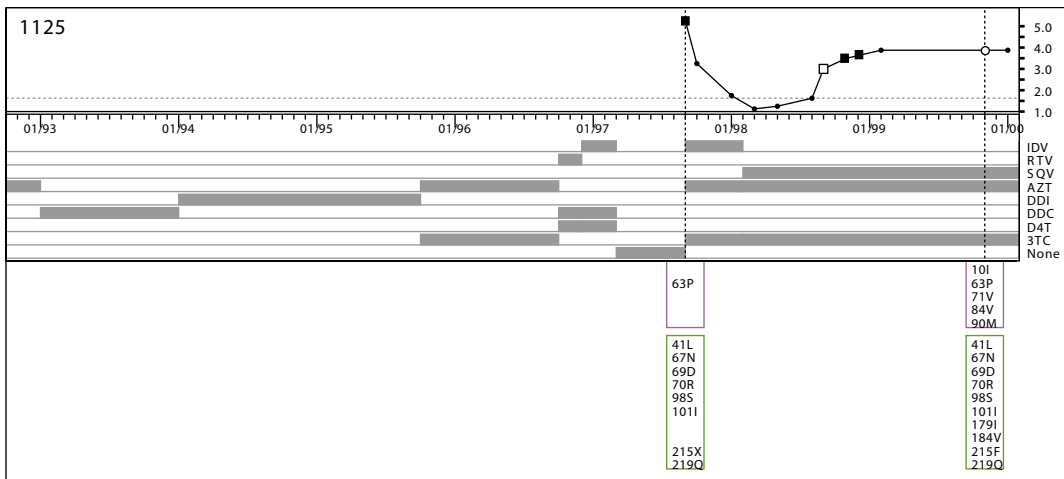

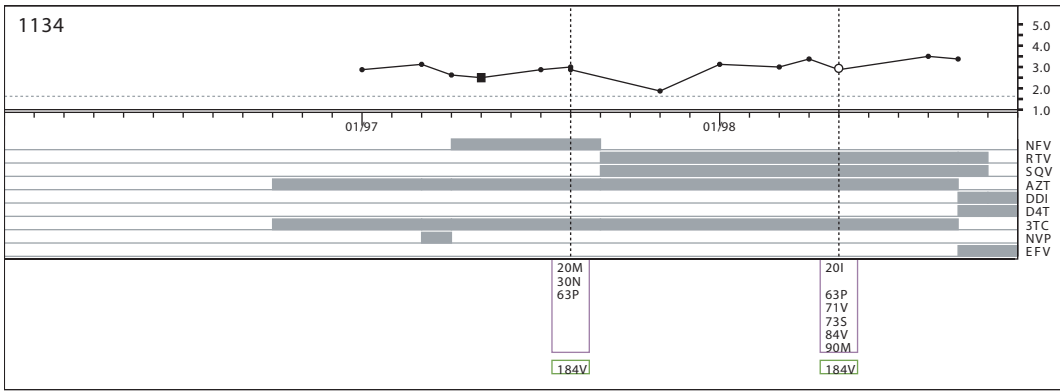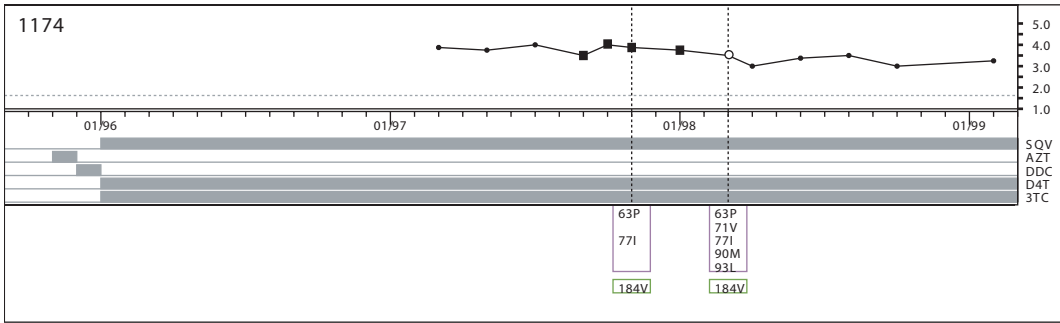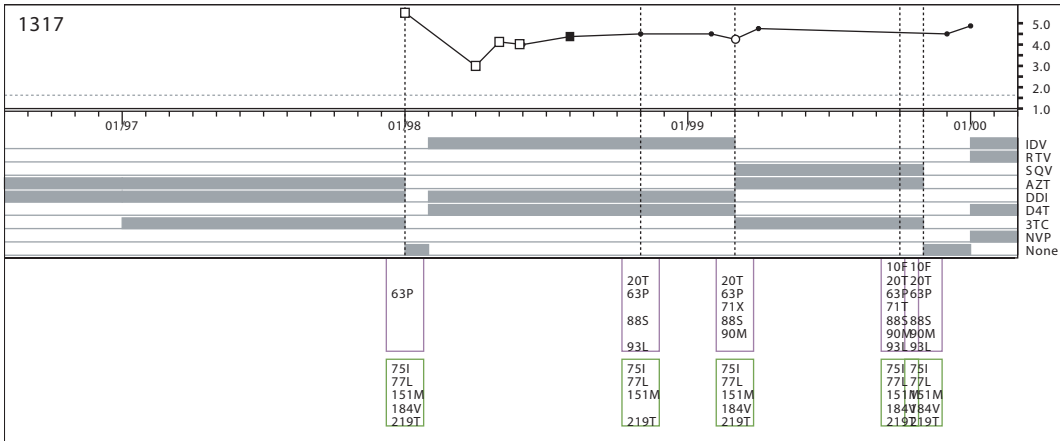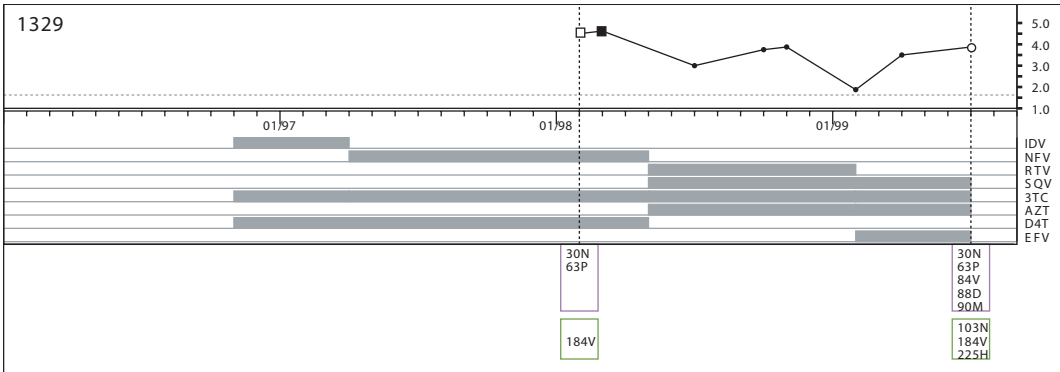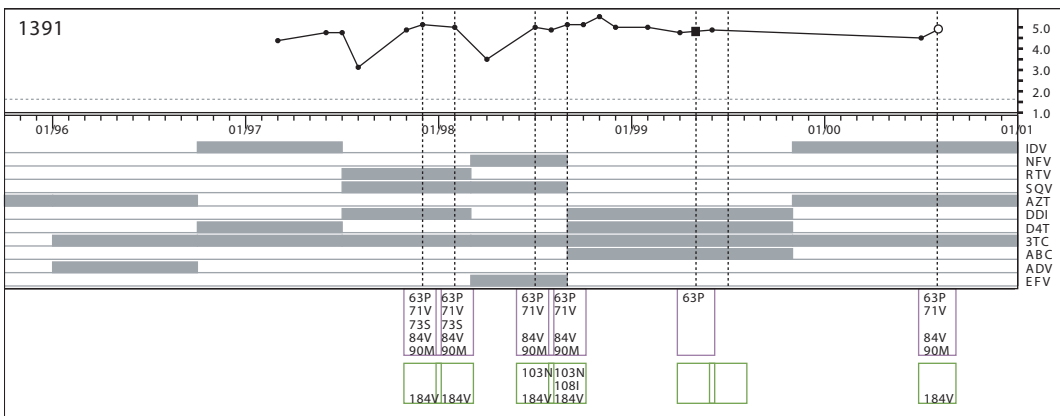

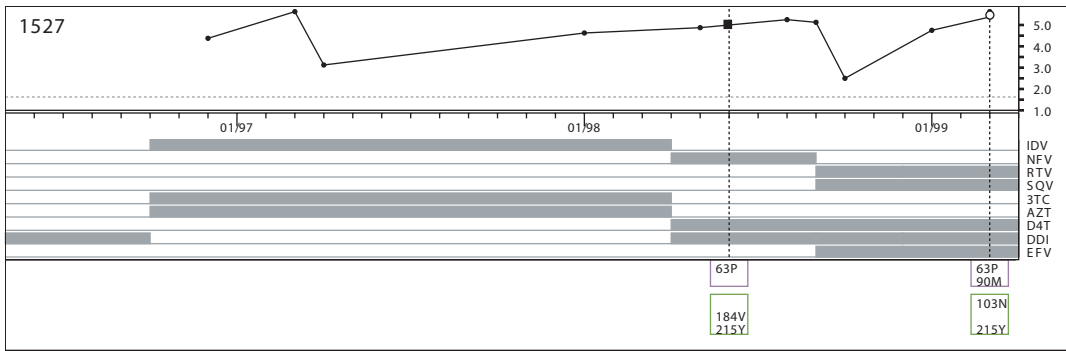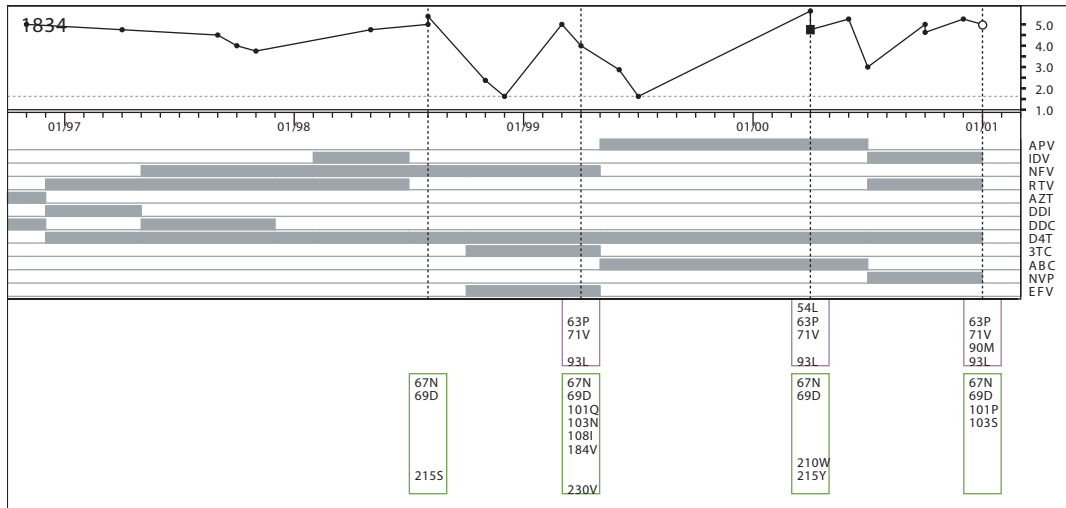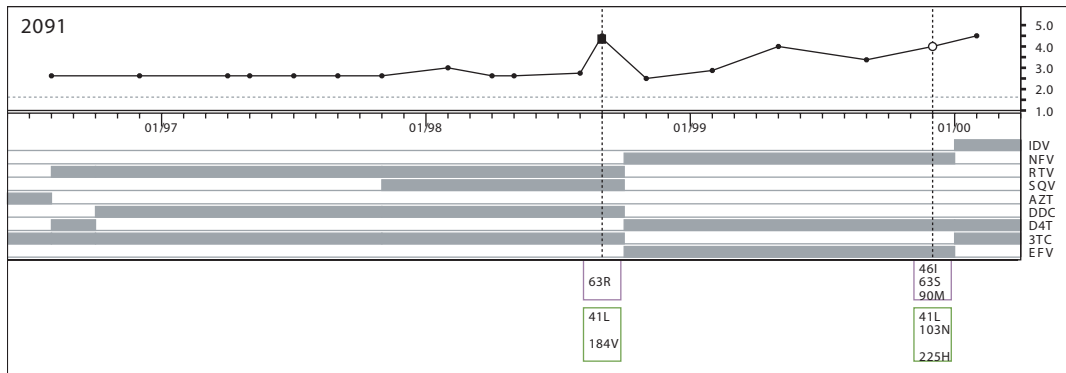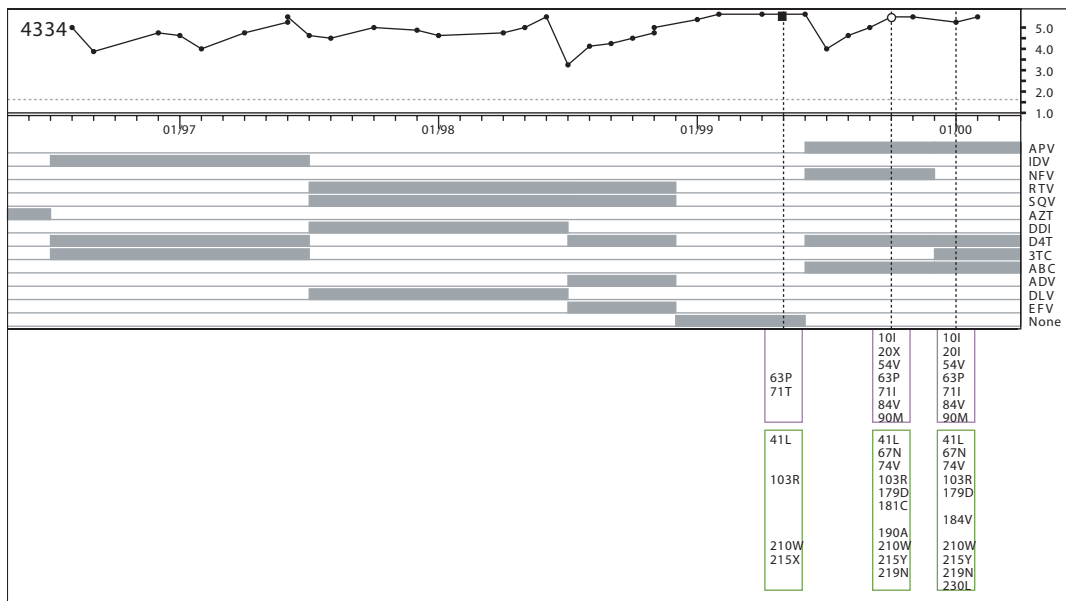

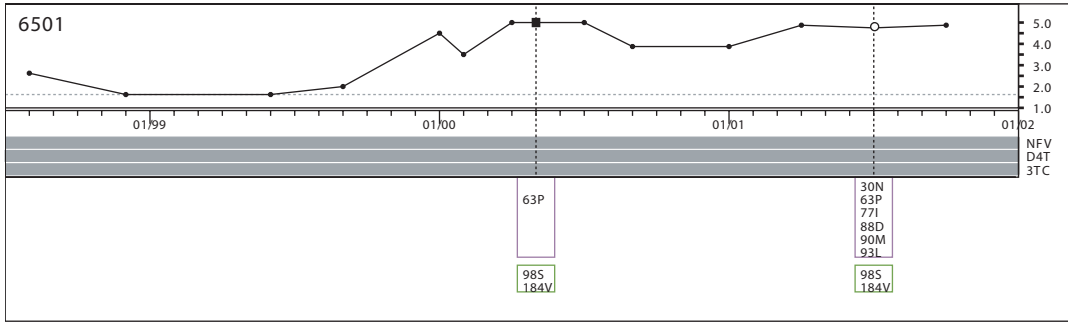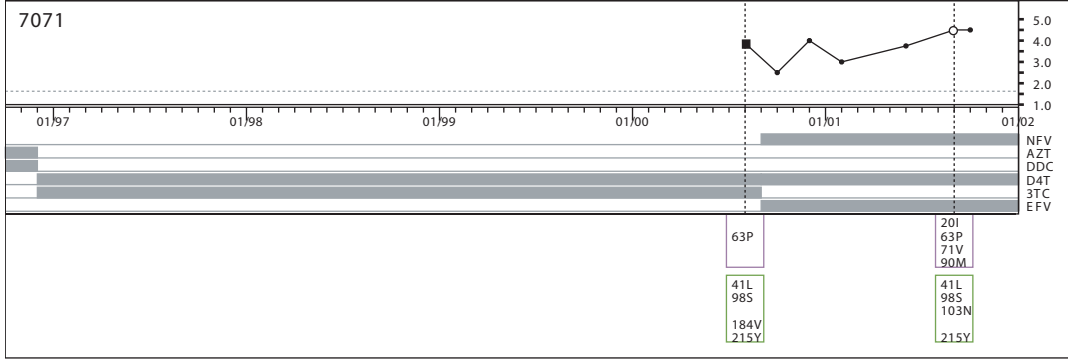

Supplement: Additional file 1 [file 1742-4690-5-7-s1.pdf]
